# Supplementary material for: Jmjd1c is dispensable for healthy adult hematopoiesis and Jak2V617F-driven myeloproliferative disease initiation in mice
Source: PLOS journal article supplement (doi:10.1371/journal.pone.0228362), 2020-02-04

S1 Fig

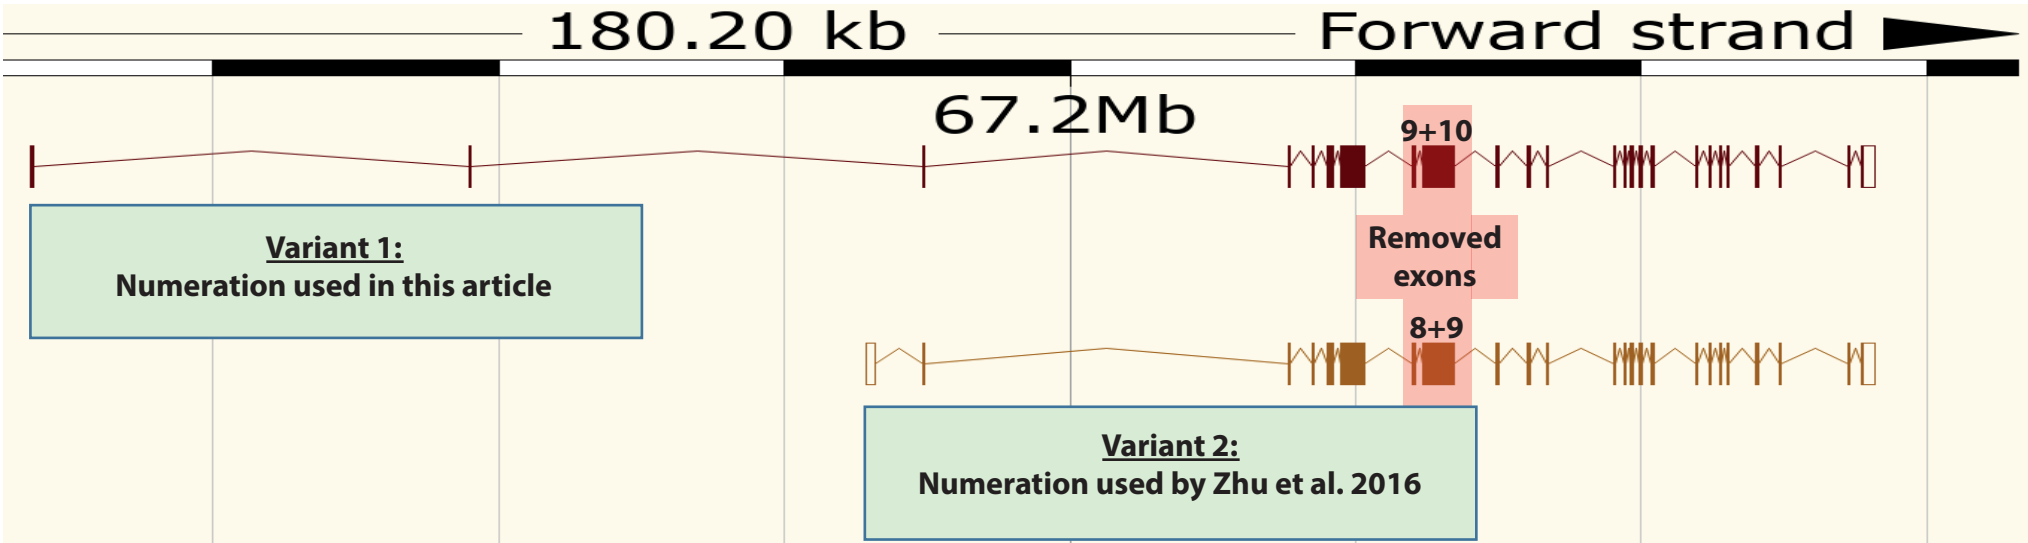

Supplement: S1 (10.1371/journal.pone.0228362.s001) [file journal.pone.0228362.s001]
